# Supplementary material
Source: publisher figshare collection journal article supplement (https://springernature.figshare.com/ndownloader/files/18097997)
Supplement: Supplementary file [file 18097997]

**Table S3. Charge and molecular weight of ADOs used in the present study.**

|               | Charge at<br>pH 8.8 | Molecular weight<br>(kDa) |
|---------------|---------------------|---------------------------|
| <i>Te</i> ADO | −12.6               | 27.3                      |
| 7421ADO       | −14.8               | 27.5                      |
| 73102ADO      | −18.1               | 27.4                      |
| 9443ADO       | −18.5               | 27.4                      |
| 6803ADO       | −18.7               | 27.3                      |
| <i>Pa</i> ADO | −19.0               | 27.2                      |
| 9313ADO       | −19.9               | 28.3                      |
| 7942ADO       | −19.9               | 27.5                      |
| 7336ADO       | −20.9               | 26.5                      |
| 7425ADO       | −21.7               | 27.5                      |

Charge at pH 8.8 and molecular weight of ADOs with a C-terminal His-tag were calculated by the Protein Calculator v3.4 (<http://protcalc.sourceforge.net/>).
